# Supplementary material
Source: MDPI journal article supplement (https://www.mdpi.com/2673-9879/4/1/11)
Supplement: s1 [file s1]

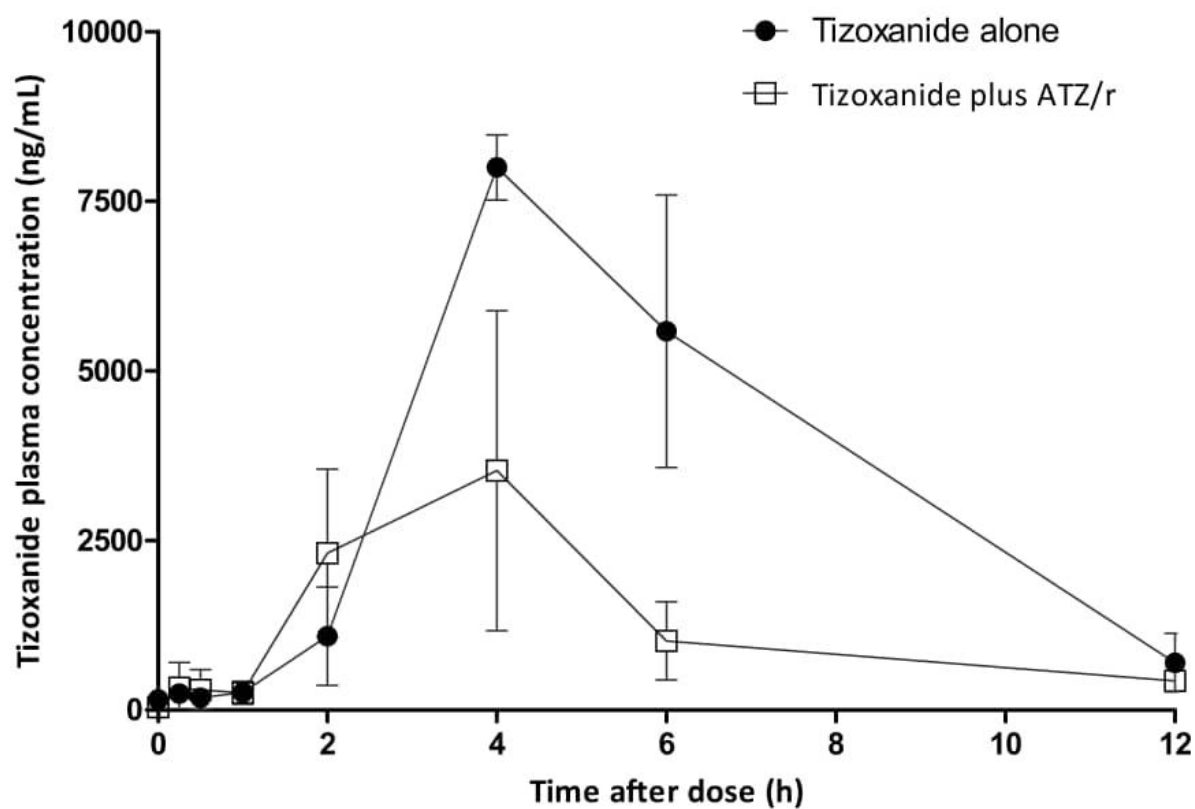

Figure S1: DBS-derived plasma concentration-time curve of tizoxanide alone and with atazanavir/ritonavir (ATZ/r); data is presented here as mean (95% CI)
